# Supplementary material for: Metastasis-Associated Lung Adenocarcinoma Transcript 1 (MALAT1) lncRNA Conformational Dynamics in Complex with RNA-Binding Protein with Serine-Rich Domain 1 (RNPS1) in the Pan-cancer Splicing and Gene Expression
Source: PubMed Central journal article supplement — ACS Omega. 2024 Oct 3;9(41):42212–26. doi: 10.1021/acsomega.4c04467 (PMC11483381; doi:10.1021/acsomega.4c04467), 2024-10-03
Supplement: ao4c04467_si_001.pdf [file ao4c04467_si_001.pdf]

Metastasis-Associated Lung Adenocarcinoma Transcript 1 lncRNA  
Conformational Dynamics in Complex with RNA-Binding Protein with Serine-Rich Domain 1  
in the Pan-cancer Splicing and Gene Expression

Aanchal Mishra and Seema Mishra\*

Department of Biochemistry, School of Life Sciences, University of Hyderabad-500046, India

**\*Corresponding author email: [seema\\_uoh@yahoo.com](mailto:seema_uoh@yahoo.com)**

**Table of contents:**

|                                                   |                  |
|---------------------------------------------------|------------------|
| <b>I. E-region-RNPS1 interactions</b>             | <b>Figure S1</b> |
| <b>II. M-region-RNPS1 interactions</b>            | <b>Figure S2</b> |
| <b>III. Full-length-region-RNPS1 interactions</b> | <b>Figure S3</b> |

**E-region-RNPS1 interactions**

**S1**

## Chain A

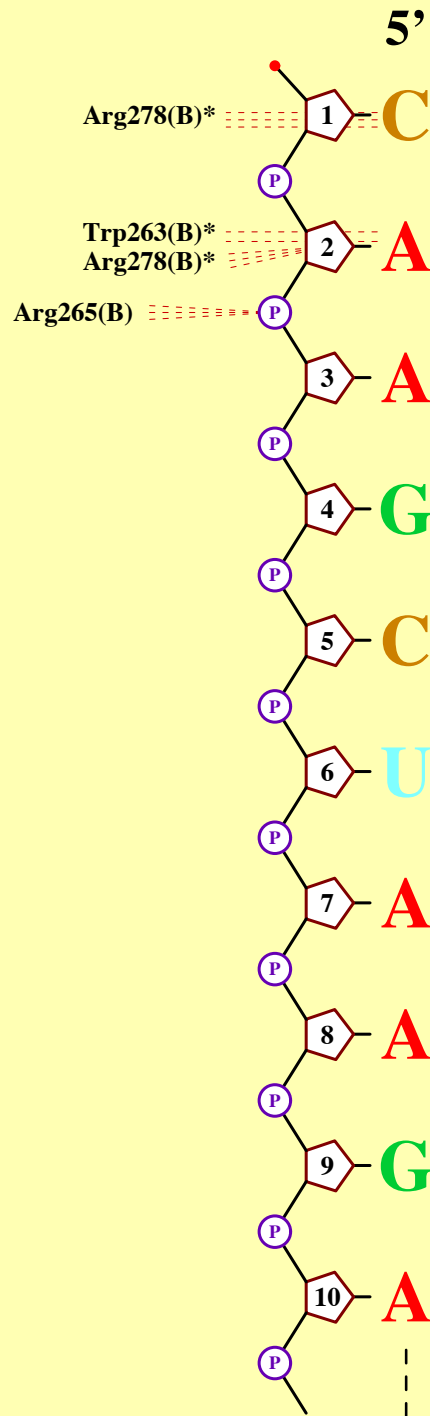

## Key

-  Backbone sugar and base-number
-  Phosphate group
- \* Residue/water on plot more than once

-  Hydrogen bond to RNA
-  Nonbonded contact to RNA (< 3.35Å)
- 88  Water molecule and number

file

## Chain A

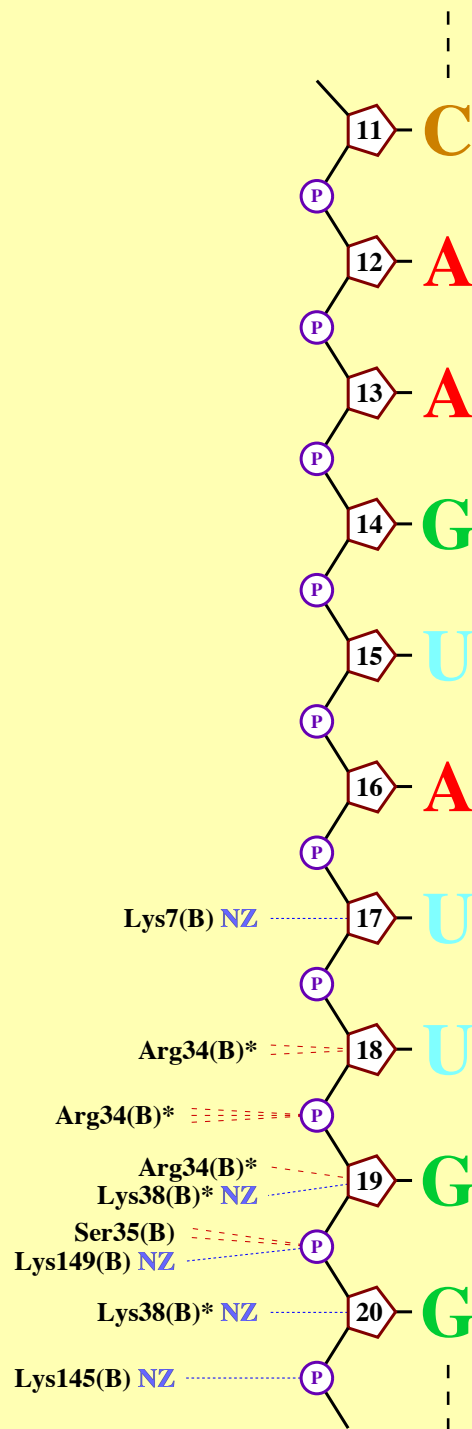

## Key

-  Backbone sugar and base-number
-  Phosphate group
- \* Residue/water on plot more than once

-  Hydrogen bond to RNA
-  Nonbonded contact to RNA (< 3.35Å)
- 88  Water molecule and number

file

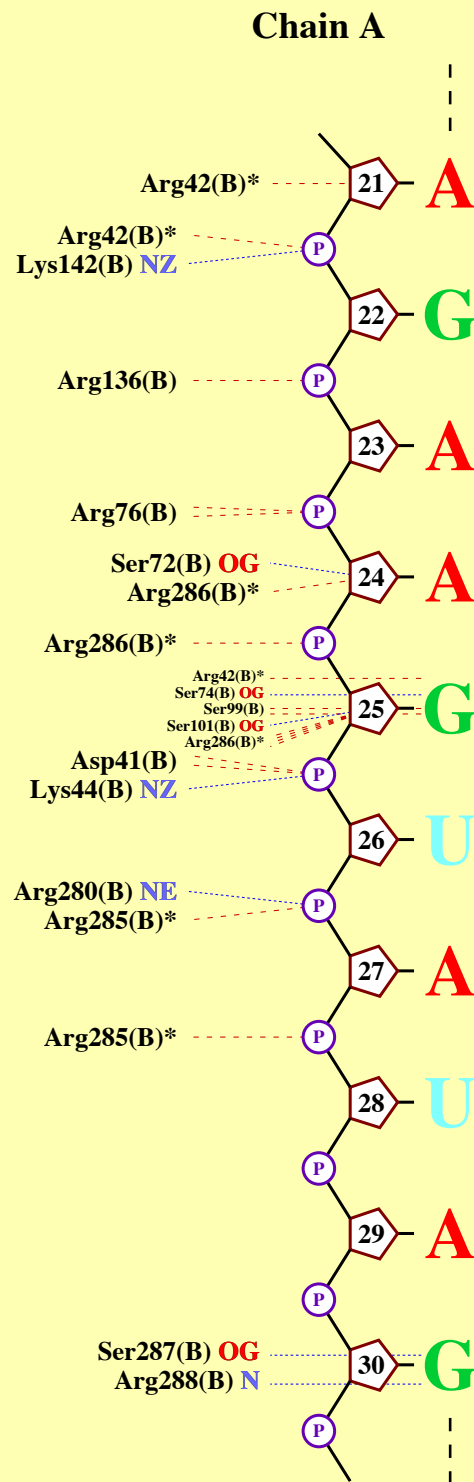

## Key

-  Backbone sugar and base-number
-  Phosphate group
- \* Residue/water on plot more than once

-  Hydrogen bond to RNA
-  Nonbonded contact to RNA (< 3.35Å)
- 88  Water molecule and number

file

## Chain A

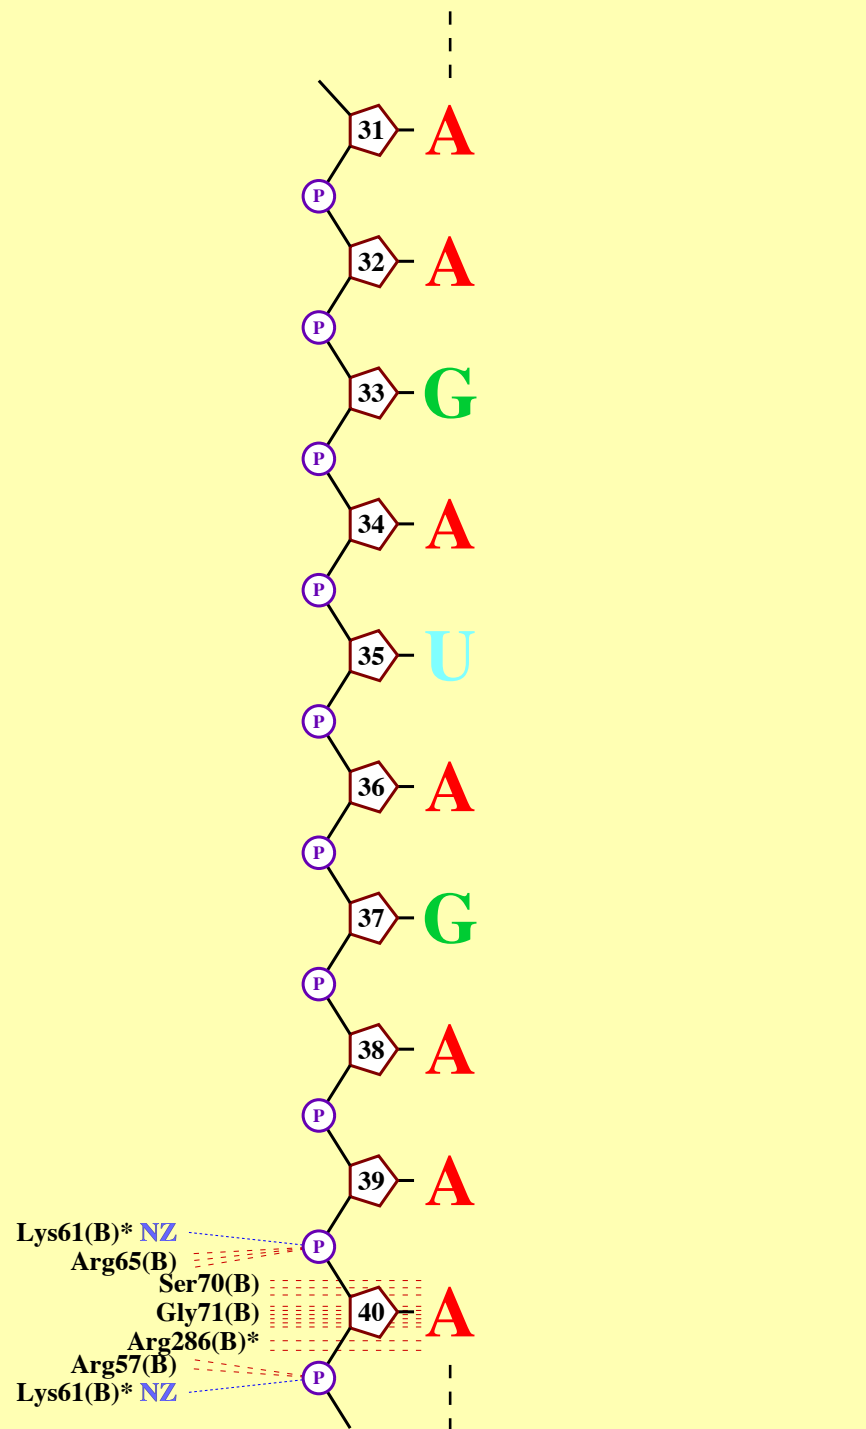

## Key

- Backbone sugar and base-number
- Phosphate group
- \* Residue/water on plot more than once

- Hydrogen bond to RNA
- Nonbonded contact to RNA (< 3.35Å)
- Water molecule and number

file

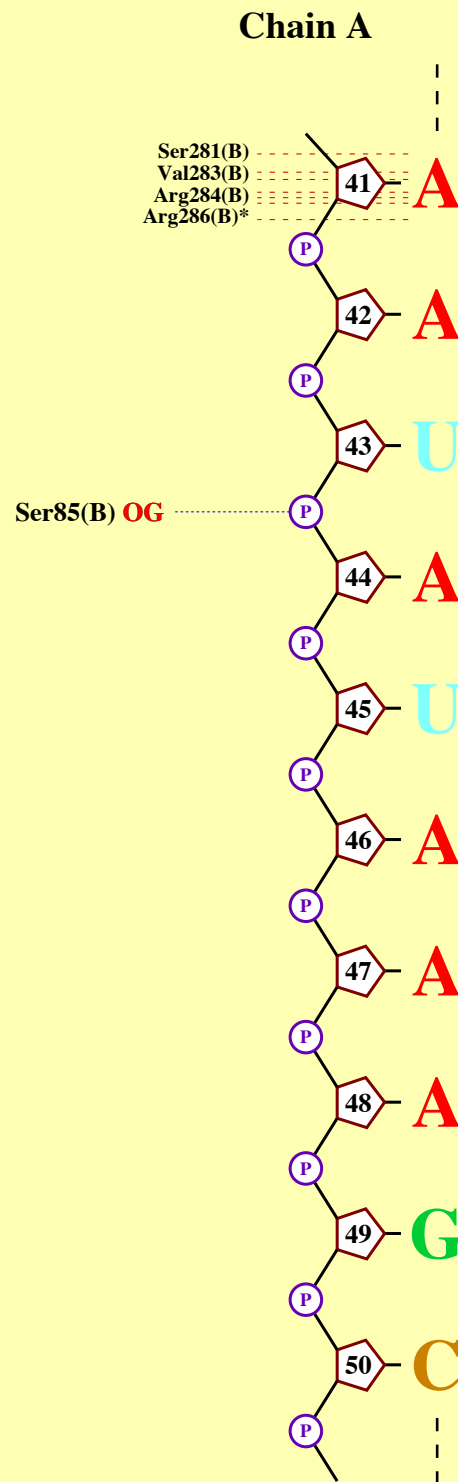

## Key

-  Backbone sugar and base-number
-  Phosphate group
- \* Residue/water on plot more than once

-  Hydrogen bond to RNA
-  Nonbonded contact to RNA (< 3.35Å)
- 88  Water molecule and number

**file**

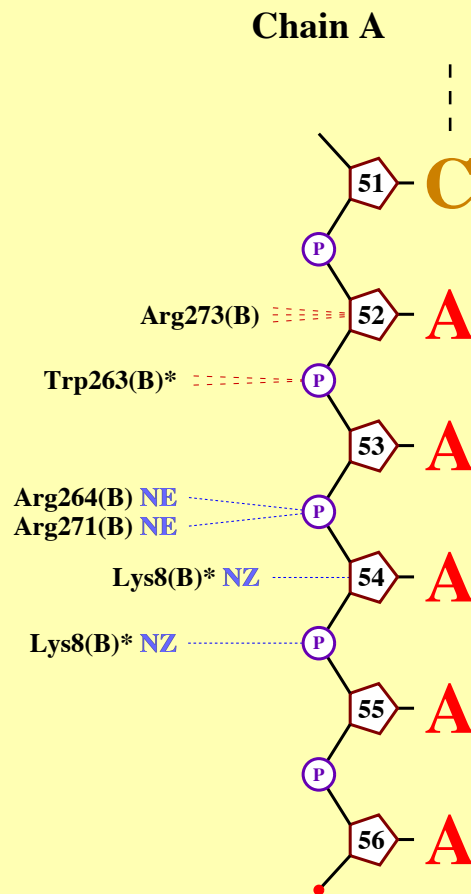

## Key

-  Backbone sugar and base-number
-  Phosphate group
- \* Residue/water on plot more than once

-  Hydrogen bond to RNA
-  Nonbonded contact to RNA (< 3.35Å)
- 88  Water molecule and number

**file**



**M-region-RNPS1 interactions**

**S2**

## Chain A

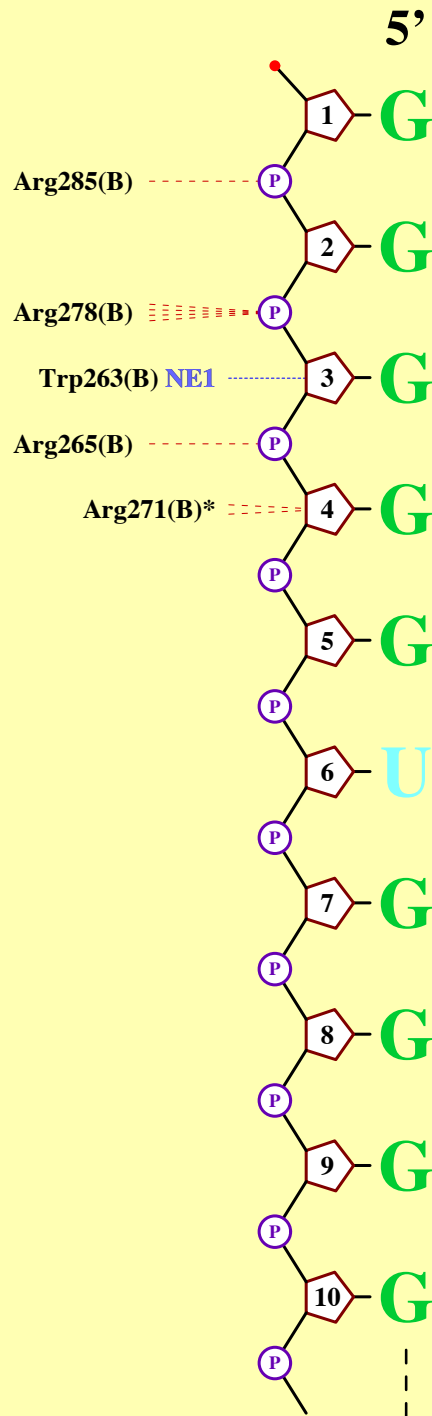

## Key

- 3** Backbone sugar and base-number
- P** Phosphate group
- \* Residue/water on plot more than once

- ..... Hydrogen bond to RNA
- Nonbonded contact to RNA (< 3.35Å)
- 88 **W** Water molecule and number

file

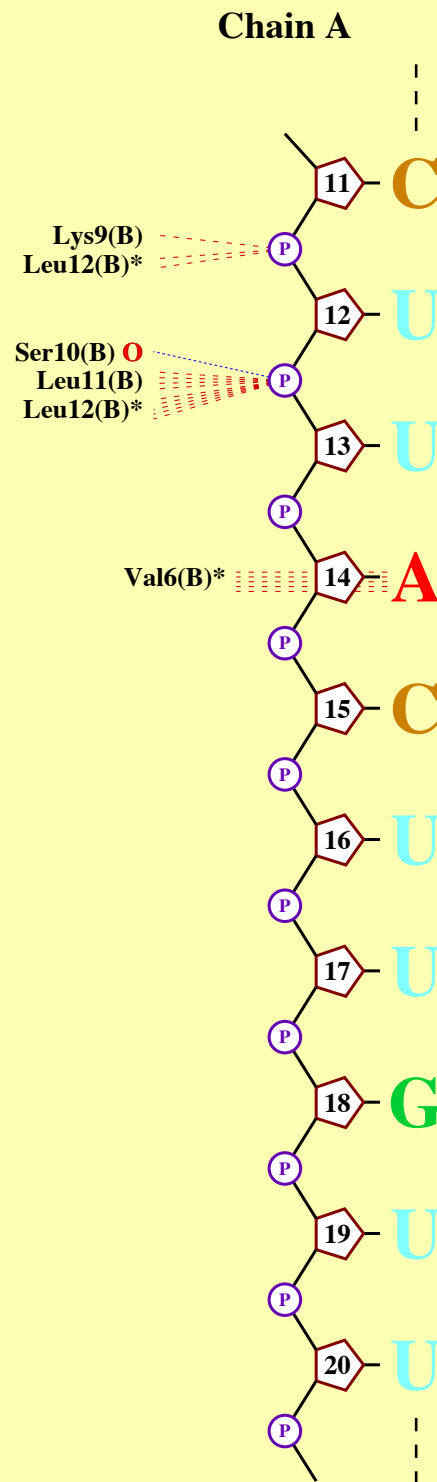

## Key

-  Backbone sugar and base-number
-  Phosphate group
- \* Residue/water on plot more than once

-  Hydrogen bond to RNA
-  Nonbonded contact to RNA (< 3.35Å)
- 88  Water molecule and number

**file**

## Chain A

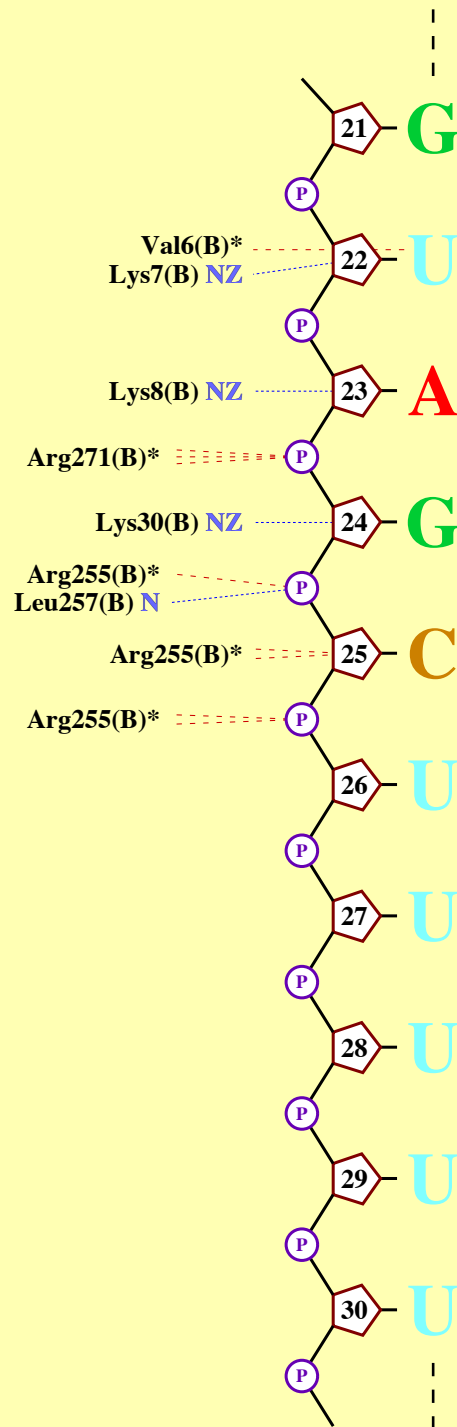

## Key

-  Backbone sugar and base-number
-  Phosphate group
- \* Residue/water on plot more than once

-  Hydrogen bond to RNA
-  Nonbonded contact to RNA (< 3.35Å)
- 88  Water molecule and number

file

## Chain A

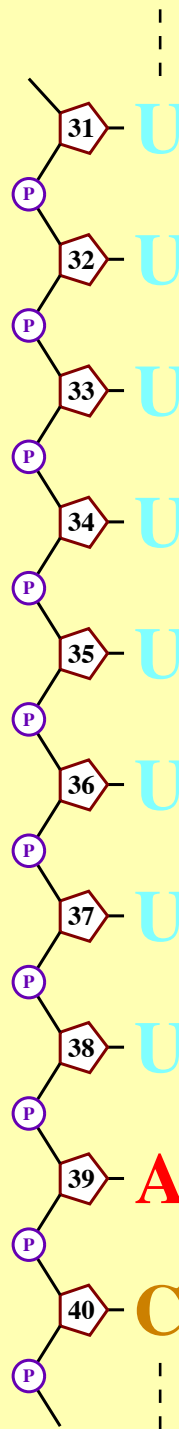

## Key

-  Backbone sugar and base-number
-  Phosphate group
- \* Residue/water on plot more than once

-  Hydrogen bond to RNA
-  Nonbonded contact to RNA (< 3.35Å)
- 88  Water molecule and number

file

## Chain A

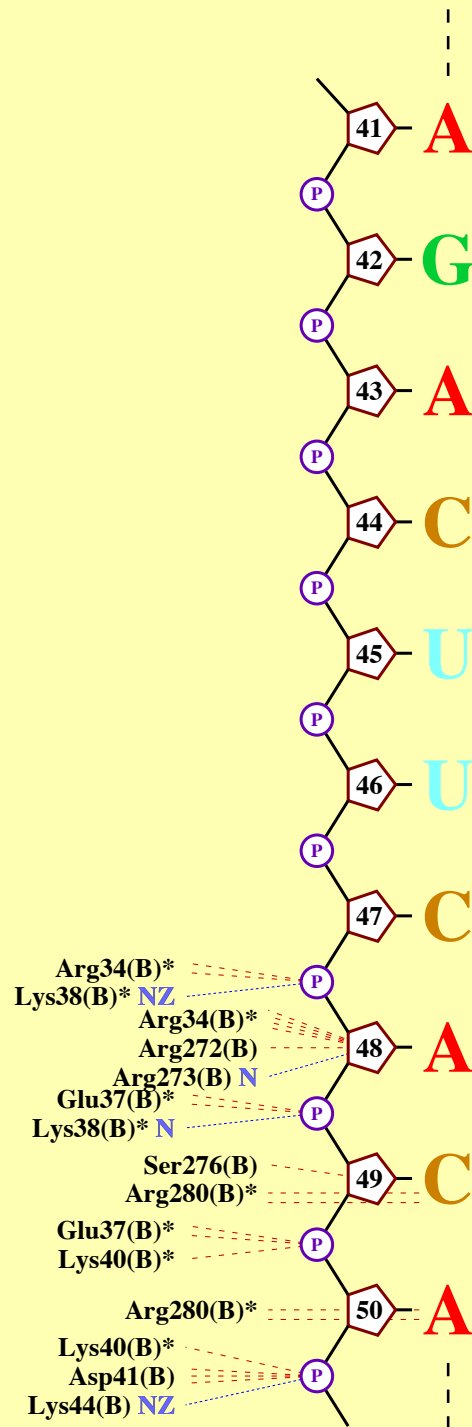

## Key

-  Backbone sugar and base-number
-  Phosphate group
- \* Residue/water on plot more than once

-  Hydrogen bond to RNA
-  Nonbonded contact to RNA (< 3.35Å)
- 88  Water molecule and number

file

## Chain A

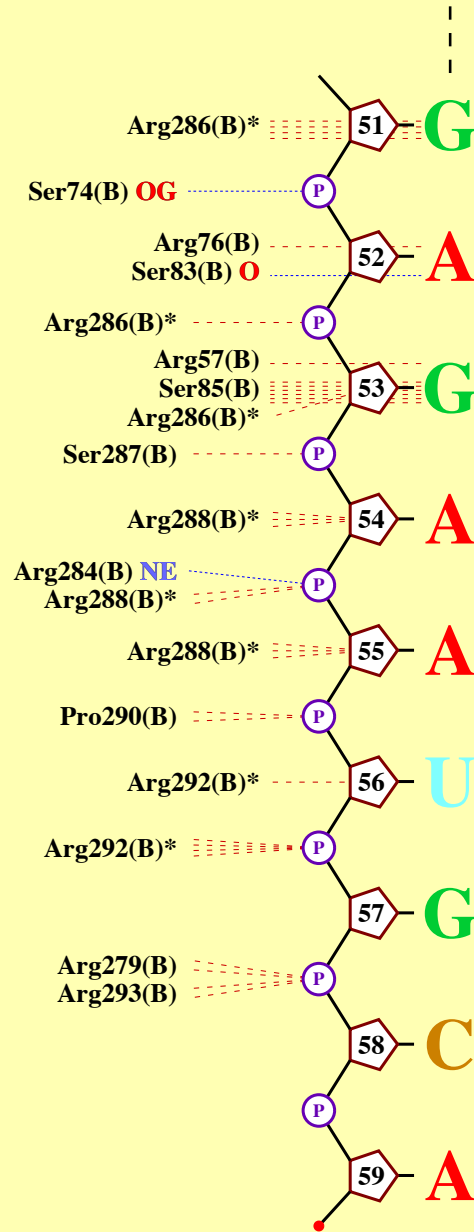

## Key

-  Backbone sugar and base-number
-  Phosphate group
- \* Residue/water on plot more than once

-  Hydrogen bond to RNA
-  Nonbonded contact to RNA (< 3.35Å)
- 88  Water molecule and number

file

**Full-length-region-RNPS1 interactions**

**S3**



## Chain A

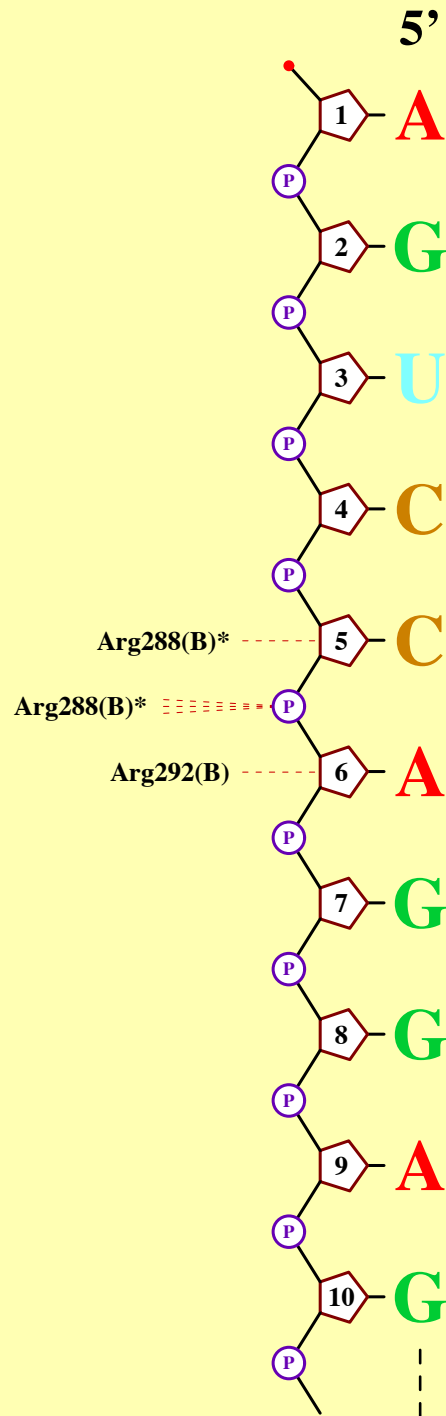

## Key

- 3 Backbone sugar and base-number
- P Phosphate group
- \* Residue/water on plot more than once

- ..... Hydrogen bond to RNA
- Nonbonded contact to RNA (< 3.35Å)
- 88 W Water molecule and number

file

## Chain A

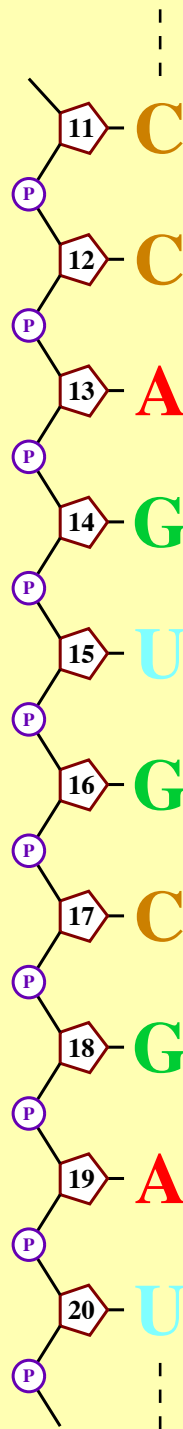

## Key

-  Backbone sugar and base-number
-  Phosphate group
- \* Residue/water on plot more than once

-  Hydrogen bond to RNA
-  Nonbonded contact to RNA (< 3.35Å)
- 88  Water molecule and number

file

## Chain A

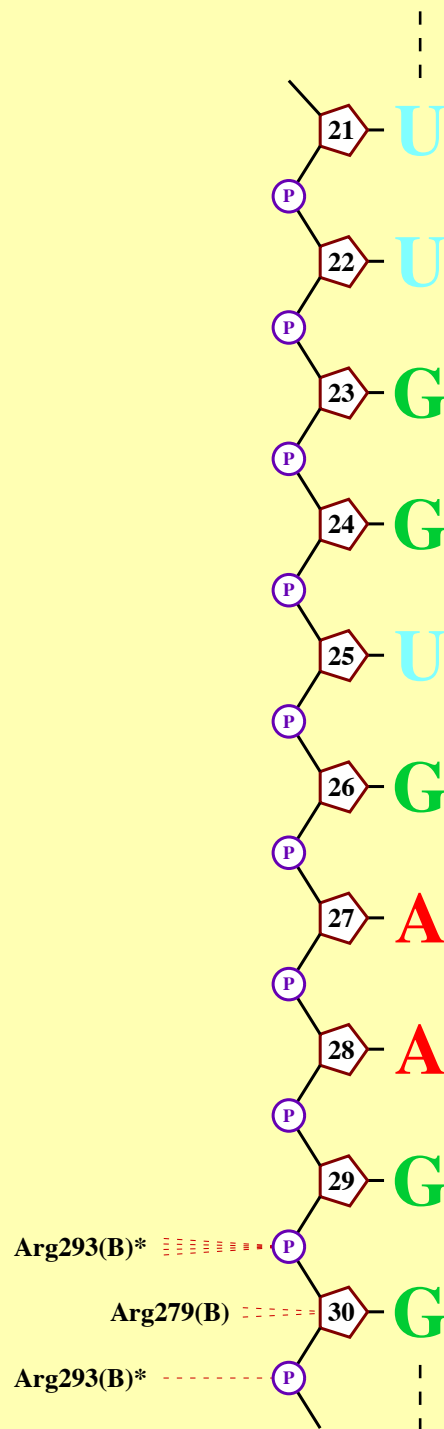

## Key

-  Backbone sugar and base-number
-  Phosphate group
- \* Residue/water on plot more than once

-  Hydrogen bond to RNA
-  Nonbonded contact to RNA (< 3.35Å)
- 88  Water molecule and number

file

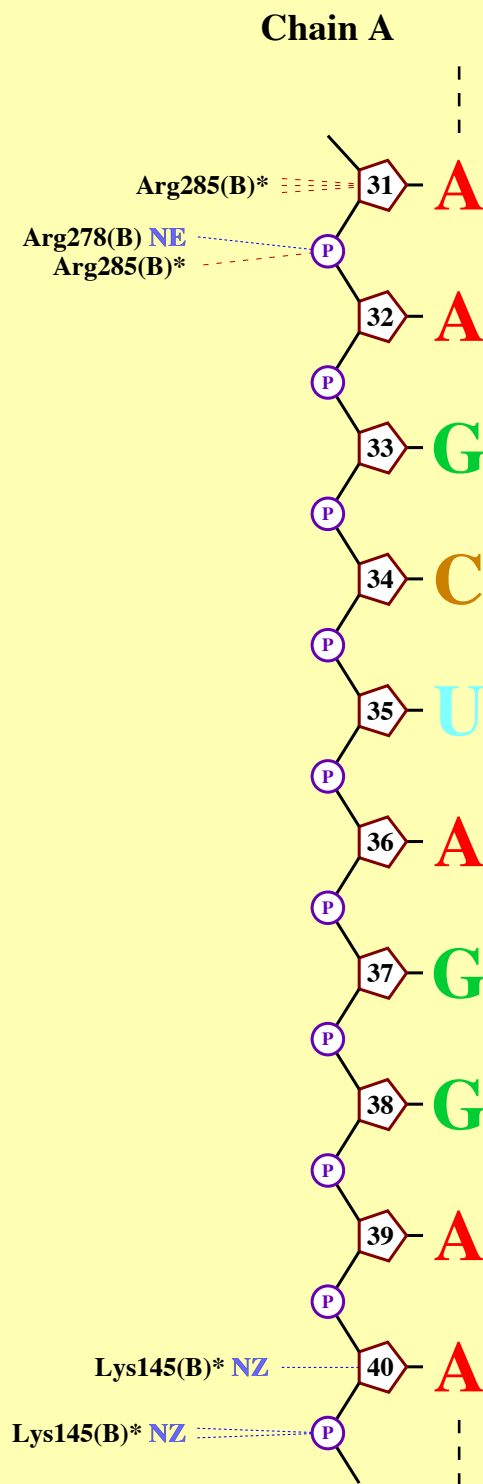

## Key

-  Backbone sugar and base-number
-  Phosphate group
- \* Residue/water on plot more than once

-  Hydrogen bond to RNA
-  Nonbonded contact to RNA (< 3.35Å)
- 88  Water molecule and number

**file**

## Chain A

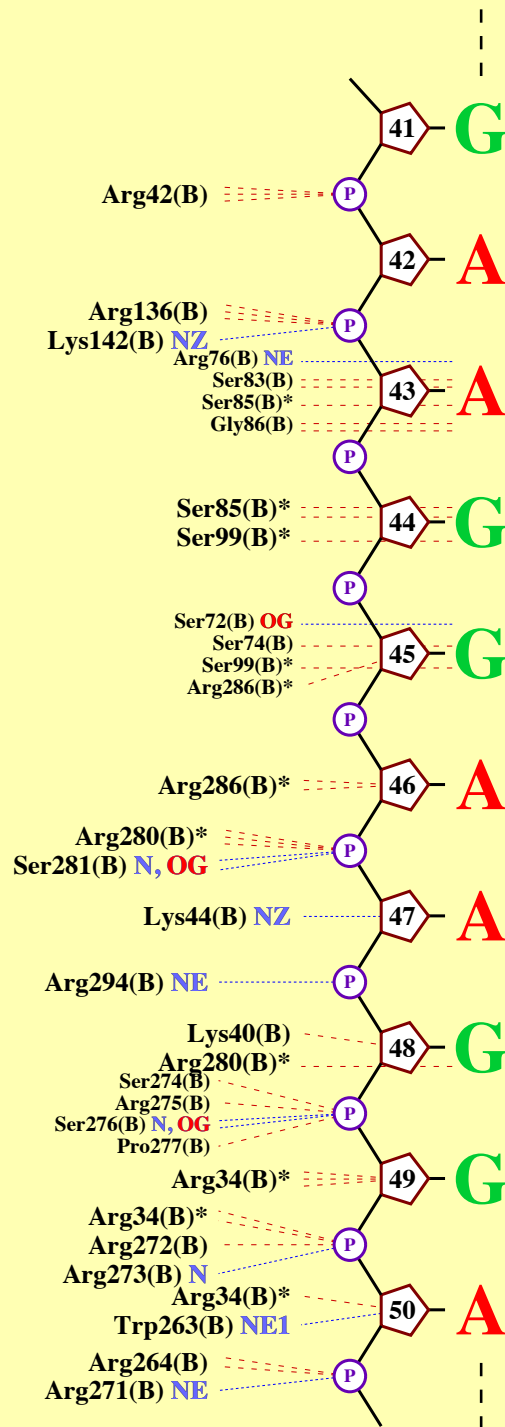

## Key

- 3 Backbone sugar and base-number
- P Phosphate group
- \* Residue/water on plot more than once

- ..... Hydrogen bond to RNA
- - - - Nonbonded contact to RNA (< 3.35Å)
- 88 W Water molecule and number

file

## Chain A

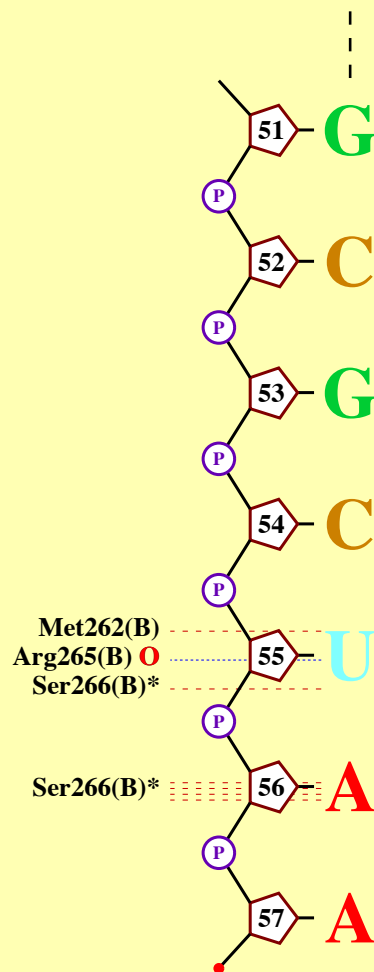

## Key

- 3** Backbone sugar and base-number  
**P** Phosphate group  
 \* Residue/water on plot more than once

- ..... Hydrogen bond to RNA  
 - - - - Nonbonded contact to RNA (< 3.35Å)  
 88 **W** Water molecule and number

file
